# Supplementary material for: Juvenile Osprey Navigation during Trans-Oceanic Migration
Source: PubMed Central journal article supplement (PMC4262435; doi:10.1371/journal.pone.0114557), 2014-12-10
Supplement: pone.0114557.s004.pdf [file pone.0114557.s004.pdf]

**Table S1.** Probability matrix of the comparison between 4<sup>th</sup>-order polynomial regression coefficients for paired osprey track segments in bicoordinate geomagnetic space.

|               | Bea (2)                   | Belle (1)                 | Belle (2)                 | Caley (1)                 | Caley (2)                 | Caley (3)                 | Felix (1)                 | Henrietta (1)             | Henrietta (2)             | Isabel (1)                | Isabel (2)                | Isabel (3)                | Luke (1)                  | Luke (2)                  | Mittark (1)               | Mittark (3)               | Moffet (1)                | Moffet (2)                | Chip (1)                  | Chip (2)                  |                           |                           |
|---------------|---------------------------|---------------------------|---------------------------|---------------------------|---------------------------|---------------------------|---------------------------|---------------------------|---------------------------|---------------------------|---------------------------|---------------------------|---------------------------|---------------------------|---------------------------|---------------------------|---------------------------|---------------------------|---------------------------|---------------------------|---------------------------|---------------------------|
| Bea (1)       | 0.06 / 0.05 / 0.05 / 0.05 | 0.19 / 0.18 / 0.18 / 0.18 | 0.41 / 0.36 / 0.31 / 0.26 | 0.08 / 0.07 / 0.07 / 0.07 | 0.96 / 0.88 / 0.81 / 0.74 | 0.72 / 0.69 / 0.66 / 0.62 | 0.07 / 0.07 / 0.07 / 0.07 | 0.09 / 0.09 / 0.09 / 0.09 | 0.67 / 0.64 / 0.61 / 0.57 | 0.08 / 0.08 / 0.08 / 0.08 | 0.91 / 0.93 / 0.95 / 0.98 | 0.97 / 0.97 / 0.97 / 0.97 | 0.24 / 0.21 / 0.19 / 0.17 | 0.88 / 0.88 / 0.87 / 0.87 | 0.85 / 0.84 / 0.83 / 0.82 | 0.57 / 0.56 / 0.55 / 0.53 | 0.74 / 0.74 / 0.74 / 0.73 | 0.08 / 0.07 / 0.07 / 0.07 | 0.52 / 0.52 / 0.53 / 0.53 | 0.26 / 0.26 / 0.26 / 0.26 |                           |                           |
| Bea (2)       |                           | 0.23 / 0.22 / 0.21 / 0.20 | 0.88 / 0.88 / 0.87 / 0.87 | 0.68 / 0.66 / 0.63 / 0.59 | 0.05 / 0.05 / 0.05 / 0.05 | 0.91 / 0.90 / 0.89 / 0.88 | 0.36 / 0.36 / 0.35 / 0.35 | 0.34 / 0.34 / 0.33 / 0.33 | 0.98 / 0.98 / 0.98 / 0.98 | 0.35 / 0.35 / 0.35 / 0.34 | 0.75 / 0.75 / 0.75 / 0.74 | 0.98 / 0.98 / 0.98 / 0.98 | 0.50 / 0.51 / 0.51 / 0.51 | 0.90 / 0.90 / 0.90 / 0.90 | 0.08 / 0.08 / 0.08 / 0.08 | 0.70 / 0.71 / 0.71 / 0.72 | 0.07 / 0.07 / 0.06 / 0.06 | 0.41 / 0.40 / 0.40 / 0.39 | 0.63 / 0.63 / 0.63 / 0.63 | 0.28 / 0.28 / 0.28 / 0.28 |                           |                           |
| Belle (1)     |                           |                           | 0.73 / 0.72 / 0.70 / 0.68 | 0.28 / 0.27 / 0.25 / 0.24 | 0.17 / 0.18 / 0.18 / 0.20 | 0.91 / 0.91 / 0.91 / 0.90 | 0.32 / 0.32 / 0.32 / 0.32 | 0.49 / 0.49 / 0.49 / 0.49 | 0.83 / 0.82 / 0.81 / 0.80 | 0.37 / 0.36 / 0.36 / 0.36 | 0.82 / 0.82 / 0.83 / 0.83 | 0.97 / 0.97 / 0.97 / 0.97 | 0.78 / 0.76 / 0.74 / 0.72 | 0.89 / 0.89 / 0.89 / 0.89 | 0.23 / 0.23 / 0.22 / 0.22 | 0.64 / 0.64 / 0.64 / 0.64 | 0.24 / 0.24 / 0.24 / 0.23 | 0.41 / 0.39 / 0.37 / 0.35 | 0.58 / 0.58 / 0.59 / 0.59 | 0.27 / 0.27 / 0.27 / 0.27 |                           |                           |
| Belle (2)     |                           |                           |                           | 0.97 / 0.97 / 0.96 / 0.95 | 0.41 / 0.39 / 0.36 / 0.33 | 0.97 / 0.96 / 0.95 / 0.94 | 0.85 / 0.85 / 0.84 / 0.84 | 0.83 / 0.82 / 0.82 / 0.81 | 0.94 / 0.94 / 0.93 / 0.93 | 0.84 / 0.84 / 0.84 / 0.83 | 0.77 / 0.77 / 0.77 / 0.77 | 0.98 / 0.98 / 0.98 / 0.98 | 0.83 / 0.83 / 0.83 / 0.83 | 0.89 / 0.90 / 0.90 / 0.90 | 0.37 / 0.33 / 0.29 / 0.25 | 0.69 / 0.69 / 0.70 / 0.70 | 0.48 / 0.44 / 0.39 / 0.34 | 0.86 / 0.86 / 0.86 / 0.86 | 0.62 / 0.62 / 0.62 / 0.62 | 0.28 / 0.28 / 0.28 / 0.28 |                           |                           |
| Caley (1)     |                           |                           |                           |                           | 0.08 / 0.08 / 0.08 / 0.07 | 0.98 / 0.97 / 0.96 / 0.96 | 0.49 / 0.49 / 0.48 / 0.48 | 0.46 / 0.46 / 0.45 / 0.45 | 0.93 / 0.92 / 0.92 / 0.91 | 0.48 / 0.47 / 0.46 / 0.45 | 0.78 / 0.78 / 0.79 / 0.79 | 0.98 / 0.98 / 0.98 / 0.98 | 0.69 / 0.70 / 0.72 / 0.74 | 0.89 / 0.90 / 0.90 / 0.90 | 0.13 / 0.13 / 0.13 / 0.13 | 0.69 / 0.70 / 0.70 / 0.70 | 0.09 / 0.09 / 0.08 / 0.08 | 0.59 / 0.58 / 0.59 / 0.59 | 0.65 / 0.65 / 0.65 / 0.65 | 0.32 / 0.32 / 0.32 / 0.32 |                           |                           |
| Caley (2)     |                           |                           |                           |                           |                           | 0.73 / 0.72 / 0.70 / 0.69 | 0.05 / 0.05 / 0.05 / 0.05 | 0.07 / 0.07 / 0.08 / 0.08 | 0.68 / 0.67 / 0.65 / 0.63 | 0.06 / 0.06 / 0.06 / 0.05 | 0.90 / 0.91 / 0.93 / 0.94 | 0.97 / 0.97 / 0.97 / 0.97 | 0.23 / 0.22 / 0.21 / 0.20 | 0.88 / 0.88 / 0.88 / 0.88 | 0.81 / 0.75 / 0.68 / 0.63 | 0.58 / 0.57 / 0.57 / 0.57 | 0.76 / 0.83 / 0.90 / 0.97 | 0.06 / 0.05 / 0.05 / 0.05 | 0.53 / 0.54 / 0.55 / 0.56 | 0.28 / 0.28 / 0.28 / 0.28 |                           |                           |
| Caley (3)     |                           |                           |                           |                           |                           |                           | 0.96 / 0.97 / 0.98 / 0.98 | 0.95 / 0.96 / 0.96 / 0.97 | 0.93 / 0.92 / 0.91 / 0.91 | 0.96 / 0.96 / 0.97 / 0.98 | 0.80 / 0.81 / 0.81 / 0.81 | 0.98 / 0.98 / 0.97 / 0.97 | 0.95 / 0.96 / 0.96 / 0.97 | 0.89 / 0.89 / 0.89 / 0.89 | 0.69 / 0.65 / 0.61 / 0.57 | 0.70 / 0.70 / 0.70 / 0.70 | 0.77 / 0.75 / 0.72 / 0.69 | 0.97 / 0.97 / 0.98 / 0.99 | 0.63 / 0.63 / 0.62 / 0.62 | 0.29 / 0.29 / 0.28 / 0.28 |                           |                           |
| Felix (1)     |                           |                           |                           |                           |                           |                           |                           | 0.78 / 0.77 / 0.76 / 0.75 | 0.88 / 0.87 / 0.87 / 0.87 | 0.81 / 0.81 / 0.82 / 0.83 | 0.80 / 0.80 / 0.80 / 0.80 | 0.97 / 0.97 / 0.97 / 0.97 | 0.93 / 0.93 / 0.93 / 0.93 | 0.89 / 0.89 / 0.89 / 0.89 | 0.12 / 0.12 / 0.12 / 0.12 | 0.65 / 0.66 / 0.66 / 0.67 | 0.07 / 0.07 / 0.07 / 0.07 | 0.91 / 0.91 / 0.91 / 0.91 | 0.59 / 0.59 / 0.59 / 0.60 | 0.26 / 0.26 / 0.26 / 0.26 |                           |                           |
| Henrietta (1) |                           |                           |                           |                           |                           |                           |                           |                           | 0.87 / 0.87 / 0.86 / 0.86 | 0.86 / 0.84 / 0.83 / 0.82 | 0.80 / 0.80 / 0.80 / 0.81 | 0.97 / 0.97 / 0.97 / 0.97 | 0.15 / 0.15 / 0.15 / 0.15 | 0.65 / 0.66 / 0.66 / 0.66 | 0.98 / 0.99 / 0.99 / 0.99 | 0.89 / 0.89 / 0.89 / 0.89 | 0.10 / 0.10 / 0.10 / 0.10 | 0.80 / 0.78 / 0.77 / 0.75 | 0.59 / 0.59 / 0.60 / 0.60 | 0.27 / 0.27 / 0.27 / 0.27 |                           |                           |
| Henrietta (2) |                           |                           |                           |                           |                           |                           |                           |                           |                           | 0.88 / 0.87 / 0.87 / 0.87 | 0.77 / 0.77 / 0.77 / 0.76 | 0.98 / 0.98 / 0.98 / 0.98 | 0.64 / 0.61 / 0.57 / 0.53 | 0.74 / 0.74 / 0.75 / 0.75 | 0.87 / 0.87 / 0.86 / 0.86 | 0.90 / 0.90 / 0.90 / 0.90 | 0.72 / 0.69 / 0.67 / 0.64 | 0.88 / 0.88 / 0.88 / 0.87 | 0.66 / 0.66 / 0.65 / 0.64 | 0.28 / 0.28 / 0.28 / 0.28 |                           |                           |
| Isabel (1)    |                           |                           |                           |                           |                           |                           |                           |                           |                           |                           | 0.80 / 0.80 / 0.80 / 0.80 | 0.97 / 0.97 / 0.97 / 0.97 | 0.95 / 0.95 / 0.95 / 0.95 | 0.89 / 0.89 / 0.89 / 0.89 | 0.13 / 0.13 / 0.13 / 0.13 | 0.66 / 0.66 / 0.66 / 0.67 | 0.08 / 0.08 / 0.08 / 0.08 | 0.86 / 0.85 / 0.85 / 0.84 | 0.59 / 0.59 / 0.60 / 0.60 | 0.27 / 0.27 / 0.27 / 0.27 |                           |                           |
| Isabel (2)    |                           |                           |                           |                           |                           |                           |                           |                           |                           |                           |                           | 0.97 / 0.97 / 0.97 / 0.97 | 0.80 / 0.80 / 0.81 / 0.81 | 0.87 / 0.87 / 0.87 / 0.87 | 0.93 / 0.95 / 0.98 / 0.98 | 0.63 / 0.63 / 0.63 / 0.64 | 0.88 / 0.90 / 0.92 / 0.94 | 0.79 / 0.79 / 0.79 / 0.79 | 0.59 / 0.58 / 0.58 / 0.58 | 0.28 / 0.28 / 0.28 / 0.29 |                           |                           |
| Isabel (3)    |                           |                           |                           |                           |                           |                           |                           |                           |                           |                           |                           |                           | 0.97 / 0.97 / 0.97 / 0.97 | 0.98 / 0.98 / 0.98 / 0.98 | 0.97 / 0.97 / 0.97 / 0.97 | 0.98 / 0.98 / 0.98 / 0.98 | 0.97 / 0.97 / 0.97 / 0.97 | 0.97 / 0.97 / 0.97 / 0.97 | 0.98 / 0.98 / 0.98 / 0.98 | 0.97 / 0.96 / 0.95 / 0.93 |                           |                           |
| Luke (1)      |                           |                           |                           |                           |                           |                           |                           |                           |                           |                           |                           |                           |                           | 0.89 / 0.89 / 0.89 / 0.89 | 0.25 / 0.23 / 0.21 / 0.20 | 0.66 / 0.66 / 0.66 / 0.67 | 0.32 / 0.28 / 0.25 / 0.23 | 0.91 / 0.91 / 0.91 / 0.91 | 0.59 / 0.60 / 0.60 / 0.60 | 0.28 / 0.28 / 0.28 / 0.28 |                           |                           |
| Luke (2)      |                           |                           |                           |                           |                           |                           |                           |                           |                           |                           |                           |                           |                           |                           |                           | 0.88 / 0.87 / 0.87 / 0.86 | 0.94 / 0.94 / 0.94 / 0.95 | 0.88 / 0.88 / 0.88 / 0.88 | 0.89 / 0.89 / 0.89 / 0.89 | 0.95 / 0.97 / 0.99 / 0.98 | 0.61 / 0.56 / 0.51 / 0.46 |                           |
| Mittark (1)   |                           |                           |                           |                           |                           |                           |                           |                           |                           |                           |                           |                           |                           |                           |                           |                           | 0.56 / 0.54 / 0.53 / 0.52 | 0.64 / 0.64 / 0.63 / 0.62 | 0.12 / 0.12 / 0.12 / 0.12 | 0.52 / 0.52 / 0.52 / 0.53 | 0.27 / 0.27 / 0.27 / 0.27 |                           |
| Mittark (3)   |                           |                           |                           |                           |                           |                           |                           |                           |                           |                           |                           |                           |                           |                           |                           |                           |                           |                           | 0.59 / 0.58 / 0.57 / 0.57 | 0.66 / 0.66 / 0.66 / 0.67 | 0.91 / 0.87 / 0.83 / 0.80 | 0.34 / 0.33 / 0.33 / 0.32 |
| Moffet (1)    |                           |                           |                           |                           |                           |                           |                           |                           |                           |                           |                           |                           |                           |                           |                           |                           |                           |                           | 0.08 / 0.08 / 0.07 / 0.07 | 0.54 / 0.54 / 0.55 / 0.55 | 0.27 / 0.27 / 0.27 / 0.27 |                           |
| Moffet (2)    |                           |                           |                           |                           |                           |                           |                           |                           |                           |                           |                           |                           |                           |                           |                           |                           |                           |                           |                           | 0.59 / 0.59 / 0.59 / 0.60 | 0.26 / 0.26 / 0.26 / 0.26 |                           |
| Chip (1)      |                           |                           |                           |                           |                           |                           |                           |                           |                           |                           |                           |                           |                           |                           |                           |                           |                           |                           |                           |                           | 0.37 / 0.38 / 0.38 / 0.38 |                           |
