# Supplementary material for: Juvenile Osprey Navigation during Trans-Oceanic Migration
Source: PubMed Central journal article supplement (PMC4262435; doi:10.1371/journal.pone.0114557), 2014-12-10
Supplement: pone.0114557.s005.pdf [file pone.0114557.s005.pdf]

Table S2. Probability matrix for t-tests performed on paired osprey track segments in transformed magnetic coordinate space ( $y_r$  vs.  $z_r$ ).

|               | Bea (2) | Belle (1) | Belle (2) | Belle (3) | Caley (1)   | Caley (2)   | Caley (3)   | Caley (4)   | Felix (1) | Felix (2)   | Henrietta (1) | Henrietta (2) | Isabel (1)  | Isabel (2)  | Isabel (3)  | Luke (1)    | Luke (2)    | Mittark (1) | Mittark (2) | Mittark (3) | Moffet (1)  | Moffet (2)  | Chip (1)    | Chip (2)    |             |
|---------------|---------|-----------|-----------|-----------|-------------|-------------|-------------|-------------|-----------|-------------|---------------|---------------|-------------|-------------|-------------|-------------|-------------|-------------|-------------|-------------|-------------|-------------|-------------|-------------|-------------|
| Bea (1)       | 0.00    | 0.00      | 0.00      | 0.00      | 0.04        | 0.00        | 0.01        | 0.00        | 0.00      | 0.04        | <b>0.06</b>   | 0.00          | 0.03        | 0.00        | 0.00        | <b>0.57</b> | <b>0.56</b> | 0.03        | 0.00        | 0.00        | 0.04        | 0.00        | 0.02        | 0.00        |             |
| Bea (2)       |         | 0.00      | 0.00      | 0.00      | 0.00        | <b>0.06</b> | 0.00        | 0.00        | 0.00      | 0.00        | 0.00          | <b>0.69</b>   | 0.00        | 0.00        | <b>0.09</b> | 0.00        | 0.00        | 0.00        | 0.00        | 0.00        | 0.01        | 0.00        | <b>0.92</b> | 0.00        |             |
| Belle (1)     |         |           | 0.00      | 0.00      | 0.00        | 0.00        | 0.00        | 0.00        | 0.00      | 0.00        | 0.00          | 0.00          | 0.00        | 0.00        | 0.00        | 0.00        | 0.00        | 0.00        | 0.00        | 0.00        | <b>0.22</b> | 0.00        | 0.00        | 0.00        |             |
| Belle (2)     |         |           |           | 0.00      | <b>0.20</b> | 0.00        | <b>0.20</b> | 0.00        | 0.00      | 0.00        | 0.00          | 0.00          | 0.01        | 0.00        | 0.00        | 0.00        | 0.00        | 0.00        | 0.00        | 0.00        | <b>0.34</b> | 0.00        | 0.00        | 0.00        |             |
| Belle (3)     |         |           |           |           | 0.00        | 0.00        | 0.00        | <b>0.32</b> | 0.00      | 0.00        | 0.00          | 0.00          | 0.00        | 0.00        | 0.01        | 0.00        | 0.00        | 0.00        | 0.00        | 0.01        | 0.00        | 0.00        | <b>0.05</b> | 0.00        |             |
| Caley (1)     |         |           |           |           |             | 0.00        | <b>0.80</b> | 0.00        | 0.00      | 0.02        | 0.00          | 0.00          | <b>0.31</b> | 0.00        | 0.00        | 0.01        | <b>0.09</b> | 0.00        | 0.00        | 0.00        | <b>0.17</b> | 0.00        | 0.01        | 0.00        |             |
| Caley (2)     |         |           |           |           |             |             |             | 0.00        | 0.00      | <b>0.51</b> | 0.00          | <b>0.08</b>   | 0.00        | <b>0.26</b> | <b>0.62</b> | 0.00        | 0.00        | 0.00        | <b>0.13</b> | 0.00        | 0.01        | <b>0.47</b> | <b>0.61</b> | <b>0.73</b> |             |
| Caley (3)     |         |           |           |           |             |             |             |             | 0.00      | 0.00        | 0.00          | 0.00          | <b>0.07</b> | 0.00        | 0.00        | 0.00        | 0.02        | 0.00        | 0.00        | 0.00        | <b>0.18</b> | 0.00        | 0.00        | 0.00        |             |
| Caley (4)     |         |           |           |           |             |             |             |             | 0.00      | 0.00        | 0.00          | 0.00          | 0.00        | 0.00        | 0.01        | 0.00        | 0.00        | 0.00        | 0.00        | 0.00        | 0.00        | 0.00        | <b>0.05</b> | 0.00        |             |
| Felix (1)     |         |           |           |           |             |             |             |             |           | 0.00        | 0.00          | 0.00          | 0.00        | <b>0.23</b> | <b>0.85</b> | 0.00        | 0.00        | 0.00        | 0.00        | 0.00        | 0.00        | 0.00        | 0.00        | <b>0.45</b> | <b>0.51</b> |
| Felix (2)     |         |           |           |           |             |             |             |             |           |             | <b>0.52</b>   | 0.00          | 0.00        | 0.00        | 0.00        | 0.01        | 0.01        | <b>0.57</b> | 0.00        | 0.00        | 0.03        | 0.00        | <b>0.22</b> | 0.00        |             |
| Henrietta (1) |         |           |           |           |             |             |             |             |           |             |               | 0.00          | 0.00        | 0.00        | 0.00        | 0.03        | 0.01        | <b>0.37</b> | 0.00        | 0.00        | 0.02        | 0.00        | <b>0.15</b> | 0.00        |             |
| Henrietta (2) |         |           |           |           |             |             |             |             |           |             |               |               | 0.00        | 0.00        | <b>0.11</b> | 0.00        | 0.00        | 0.00        | 0.00        | 0.00        | 0.01        | 0.01        | <b>0.96</b> | 0.00        |             |
| Isabel (1)    |         |           |           |           |             |             |             |             |           |             |               |               |             | 0.00        | 0.00        | 0.00        | <b>0.12</b> | 0.00        | 0.00        | 0.00        | <b>0.09</b> | 0.00        | 0.00        | 0.00        |             |
| Isabel (2)    |         |           |           |           |             |             |             |             |           |             |               |               |             |             | <b>0.88</b> | 0.00        | 0.00        | 0.00        | <b>0.41</b> | 0.00        | 0.01        | 0.00        | <b>0.37</b> | <b>0.16</b> |             |
| Isabel (3)    |         |           |           |           |             |             |             |             |           |             |               |               |             |             |             | 0.00        | 0.00        | 0.00        | <b>0.69</b> | 0.04        | 0.01        | <b>0.32</b> | <b>0.46</b> | <b>0.73</b> |             |
| Luke (1)      |         |           |           |           |             |             |             |             |           |             |               |               |             |             |             |             | <b>0.18</b> | 0.01        | 0.00        | 0.00        | 0.03        | 0.00        | 0.03        | 0.00        |             |
| Luke (2)      |         |           |           |           |             |             |             |             |           |             |               |               |             |             |             |             |             | 0.00        | 0.00        | 0.00        | <b>0.06</b> | 0.00        | 0.01        | 0.00        |             |
| Mittark (1)   |         |           |           |           |             |             |             |             |           |             |               |               |             |             |             |             |             |             |             | 0.00        | 0.00        | 0.02        | 0.00        | <b>0.24</b> | 0.00        |
| Mittark (2)   |         |           |           |           |             |             |             |             |           |             |               |               |             |             |             |             |             |             |             |             | 0.00        | 0.01        | 0.00        | <b>0.32</b> | 0.01        |
| Mittark (3)   |         |           |           |           |             |             |             |             |           |             |               |               |             |             |             |             |             |             |             |             |             | 0.00        | 0.00        | <b>0.06</b> | 0.00        |
| Moffet (1)    |         |           |           |           |             |             |             |             |           |             |               |               |             |             |             |             |             |             |             |             |             | 0.00        | 0.01        | 0.01        |             |
| Moffet (2)    |         |           |           |           |             |             |             |             |           |             |               |               |             |             |             |             |             |             |             |             |             |             |             | <b>0.75</b> | 0.03        |
| Chip (1)      |         |           |           |           |             |             |             |             |           |             |               |               |             |             |             |             |             |             |             |             |             |             |             |             | <b>0.52</b> |

P-values that are not significantly different ( $\alpha=0.05$ ) are shown in bold. doi:10.1371/journal.pone.XXXXXX.YYYY
