# Supplementary material for: Juvenile Osprey Navigation during Trans-Oceanic Migration
Source: PubMed Central journal article supplement (PMC4262435; doi:10.1371/journal.pone.0114557), 2014-12-10
Supplement: pone.0114557.s006.pdf [file pone.0114557.s006.pdf]

Table S3. Probability matrix for t-tests performed on paired osprey track segments in Mercator coordinate space.

|               | Bea (2)     | Belle (1) | Belle (2)   | Belle (3) | Caley (1) | Caley (2)   | Caley (3) | Caley (4)   | Felix (1)   | Felix (2)   | Henrietta (1) | Henrietta (2) | Isabel (1) | Isabel (2)  | Isabel (3)  | Luke (1)    | Luke (2)    | Mittark (1) | Mittark (2) | Mittark (3) | Moffet (1)  | Moffet (2)  | Chip (1)    | Chip (2)    |
|---------------|-------------|-----------|-------------|-----------|-----------|-------------|-----------|-------------|-------------|-------------|---------------|---------------|------------|-------------|-------------|-------------|-------------|-------------|-------------|-------------|-------------|-------------|-------------|-------------|
| Bea (1)       | <b>0.11</b> | 0.00      | <b>0.36</b> | 0.03      | 0.00      | <b>0.55</b> | 0.00      | 0.03        | <b>0.05</b> | <b>0.28</b> | <b>0.38</b>   | <b>0.11</b>   | 0.00       | <b>0.05</b> | <b>0.07</b> | <b>0.83</b> | <b>0.32</b> | <b>0.19</b> | <b>0.35</b> | 0.03        | 0.00        | <b>0.06</b> | 0.00        | 0.04        |
| Bea (2)       |             | 0.00      | 0.00        | 0.00      | 0.00      | 0.03        | 0.00      | 0.00        | 0.00        | <b>0.94</b> | 0.00          | <b>0.73</b>   | 0.00       | 0.00        | <b>0.06</b> | <b>0.92</b> | 0.00        | 0.00        | 0.00        | 0.00        | 0.00        | 0.00        | 0.00        | 0.00        |
| Belle (1)     |             |           | 0.00        | 0.00      | 0.00      | 0.00        | 0.00      | 0.00        | 0.00        | <b>0.05</b> | 0.00          | 0.00          | 0.00       | 0.00        | 0.00        | <b>0.63</b> | 0.00        | 0.00        | 0.00        | 0.00        | 0.00        | 0.00        | 0.00        | 0.00        |
| Belle (2)     |             |           |             | 0.00      | 0.00      | 0.00        | 0.00      | 0.00        | 0.00        | 0.03        | 0.00          | 0.00          | 0.00       | 0.00        | 0.00        | <b>0.69</b> | <b>0.68</b> | 0.00        | 0.00        | 0.00        | 0.00        | 0.00        | 0.00        | 0.00        |
| Belle (3)     |             |           |             |           | 0.00      | 0.00        | 0.00      | <b>0.51</b> | 0.00        | <b>0.44</b> | 0.00          | 0.00          | 0.00       | 0.00        | 0.00        | <b>0.81</b> | 0.00        | 0.00        | 0.00        | 0.00        | 0.00        | 0.00        | 0.00        | 0.00        |
| Caley (1)     |             |           |             |           |           | 0.00        | 0.00      | 0.00        | 0.00        | <b>0.08</b> | 0.00          | 0.00          | 0.00       | 0.00        | 0.00        | <b>0.57</b> | 0.00        | 0.00        | 0.00        | 0.00        | 0.02        | 0.00        | 0.00        | 0.00        |
| Caley (2)     |             |           |             |           |           |             | 0.00      | 0.00        | 0.00        | <b>0.42</b> | <b>0.56</b>   | 0.03          | 0.00       | 0.00        | 0.01        | <b>0.92</b> | <b>0.05</b> | <b>0.11</b> | <b>0.48</b> | 0.00        | 0.00        | 0.01        | 0.00        | 0.00        |
| Caley (3)     |             |           |             |           |           |             |           | 0.00        | 0.00        | 0.00        | 0.00          | 0.00          | 0.00       | 0.00        | 0.00        | <b>0.38</b> | 0.00        | 0.00        | 0.00        | 0.00        | 0.00        | 0.00        | 0.00        | 0.00        |
| Caley (4)     |             |           |             |           |           |             |           |             | 0.00        | <b>0.47</b> | 0.00          | 0.00          | 0.00       | 0.00        | 0.00        | <b>0.81</b> | 0.00        | 0.00        | 0.00        | 0.00        | 0.00        | 0.00        | 0.00        | 0.00        |
| Felix (1)     |             |           |             |           |           |             |           |             |             | <b>0.67</b> | 0.00          | 0.00          | 0.00       | 0.00        | <b>0.71</b> | <b>0.87</b> | 0.00        | 0.00        | 0.00        | 0.00        | 0.00        | 0.00        | 0.00        | 0.00        |
| Felix (2)     |             |           |             |           |           |             |           |             |             |             | <b>0.51</b>   | <b>0.92</b>   | 0.00       | <b>0.57</b> | <b>0.72</b> | <b>0.94</b> | <b>0.05</b> | <b>0.83</b> | <b>0.59</b> | <b>0.49</b> | 0.04        | <b>0.74</b> | 0.00        | <b>0.56</b> |
| Henrietta (1) |             |           |             |           |           |             |           |             |             |             |               | 0.00          | 0.00       | 0.00        | 0.00        | <b>0.96</b> | 0.02        | 0.00        | <b>0.69</b> | 0.00        | 0.00        | 0.00        | 0.00        | 0.00        |
| Henrietta (2) |             |           |             |           |           |             |           |             |             |             |               |               | 0.00       | 0.00        | <b>0.09</b> | <b>0.92</b> | 0.00        | 0.00        | 0.00        | 0.00        | 0.00        | 0.00        | 0.00        | 0.00        |
| Isabel (1)    |             |           |             |           |           |             |           |             |             |             |               |               |            | 0.00        | 0.00        | <b>0.06</b> | 0.00        | 0.00        | 0.00        | 0.00        | 0.00        | 0.00        | 0.04        | 0.00        |
| Isabel (2)    |             |           |             |           |           |             |           |             |             |             |               |               |            |             | <b>0.15</b> | <b>0.85</b> | 0.00        | 0.00        | 0.00        | 0.00        | 0.00        | 0.00        | 0.00        | <b>0.60</b> |
| Isabel (3)    |             |           |             |           |           |             |           |             |             |             |               |               |            |             |             | <b>0.88</b> | 0.00        | 0.00        | 0.00        | 0.02        | 0.00        | <b>0.75</b> | 0.00        | <b>0.12</b> |
| Luke (1)      |             |           |             |           |           |             |           |             |             |             |               |               |            |             |             |             | <b>0.64</b> | <b>0.97</b> | <b>0.97</b> | <b>0.83</b> | <b>0.60</b> | <b>0.89</b> | <b>0.17</b> | <b>0.85</b> |
| Luke (2)      |             |           |             |           |           |             |           |             |             |             |               |               |            |             |             |             |             | 0.01        | 0.02        | 0.00        | 0.00        | 0.00        | 0.00        | 0.00        |
| Mittark (1)   |             |           |             |           |           |             |           |             |             |             |               |               |            |             |             |             |             |             |             | 0.04        | 0.00        | 0.00        | 0.00        | 0.00        |
| Mittark (2)   |             |           |             |           |           |             |           |             |             |             |               |               |            |             |             |             |             |             |             |             | 0.00        | 0.00        | 0.00        | 0.00        |
| Mittark (3)   |             |           |             |           |           |             |           |             |             |             |               |               |            |             |             |             |             |             |             |             | 0.00        | 0.00        | 0.00        | 0.01        |
| Moffet (1)    |             |           |             |           |           |             |           |             |             |             |               |               |            |             |             |             |             |             |             |             |             | 0.00        | 0.00        | 0.00        |
| Moffet (2)    |             |           |             |           |           |             |           |             |             |             |               |               |            |             |             |             |             |             |             |             |             |             | 0.00        | 0.00        |
| Chip (1)      |             |           |             |           |           |             |           |             |             |             |               |               |            |             |             |             |             |             |             |             |             |             |             | 0.00        |

P-values that are not significantly different ( $\alpha=0.05$ ) are shown in bold. doi:10.1371/journal.pone.XXXXXX.YYYY
